# Supplementary material for: Direct pathway cloning and expression of the radiosumin biosynthetic gene cluster
Source: Royal Society of Chemistry journal article supplement (doi:10.1039/d3ob00385j), 2023-01-01
Supplement: d3ob00385j1.pdf [file d3ob00385j1.pdf]

## Supplementary information for

### Direct pathway cloning and expression of the radiosumin biosynthetic gene cluster

Xiaodan Ouyang,<sup>a</sup> Paul M. D'Agostino,<sup>b</sup> Matti Wahlsten,<sup>a</sup> Andrews Delbaje,<sup>c</sup> Jouni Jokela,<sup>a</sup> Perttu Permi,<sup>d,e</sup>  
Greta Gaiani,<sup>a</sup> Antti Poso,<sup>f</sup> Piiia Bartos,<sup>f</sup> Tobias A. M. Gulder,<sup>b</sup> Hannu Koistinen,<sup>g</sup> David P. Fewer<sup>a,\*</sup>

*a. Department of Microbiology, University of Helsinki, Viikinkaari 9, FI-00014 Helsinki, Finland*

*b. Chair of Technical Biochemistry, Technical University of Dresden, Bergstraße 66, 01069 Dresden, Germany*

*c. Center for Nuclear Energy in Agriculture, University of São Paulo, Avenida Centenário 303, Piracicaba 13400-970, São Paulo, Brazil*

*d. Department of Chemistry, University of Jyväskylä, Finland*

*e. Department of Biological and Environmental Science, Nanoscience Center, University of Jyväskylä, Finland*

*f. Kuopio Campus, School of Pharmacy, University of Eastern Finland*

*g. Department of Clinical Chemistry and Haematology, Faculty of Medicine, University of Helsinki and Helsinki University Hospital, Helsinki FIN-00014, Finland*

\* Corresponding author

E-mail address: [david.fewer@helsinki.fi](mailto:david.fewer@helsinki.fi)

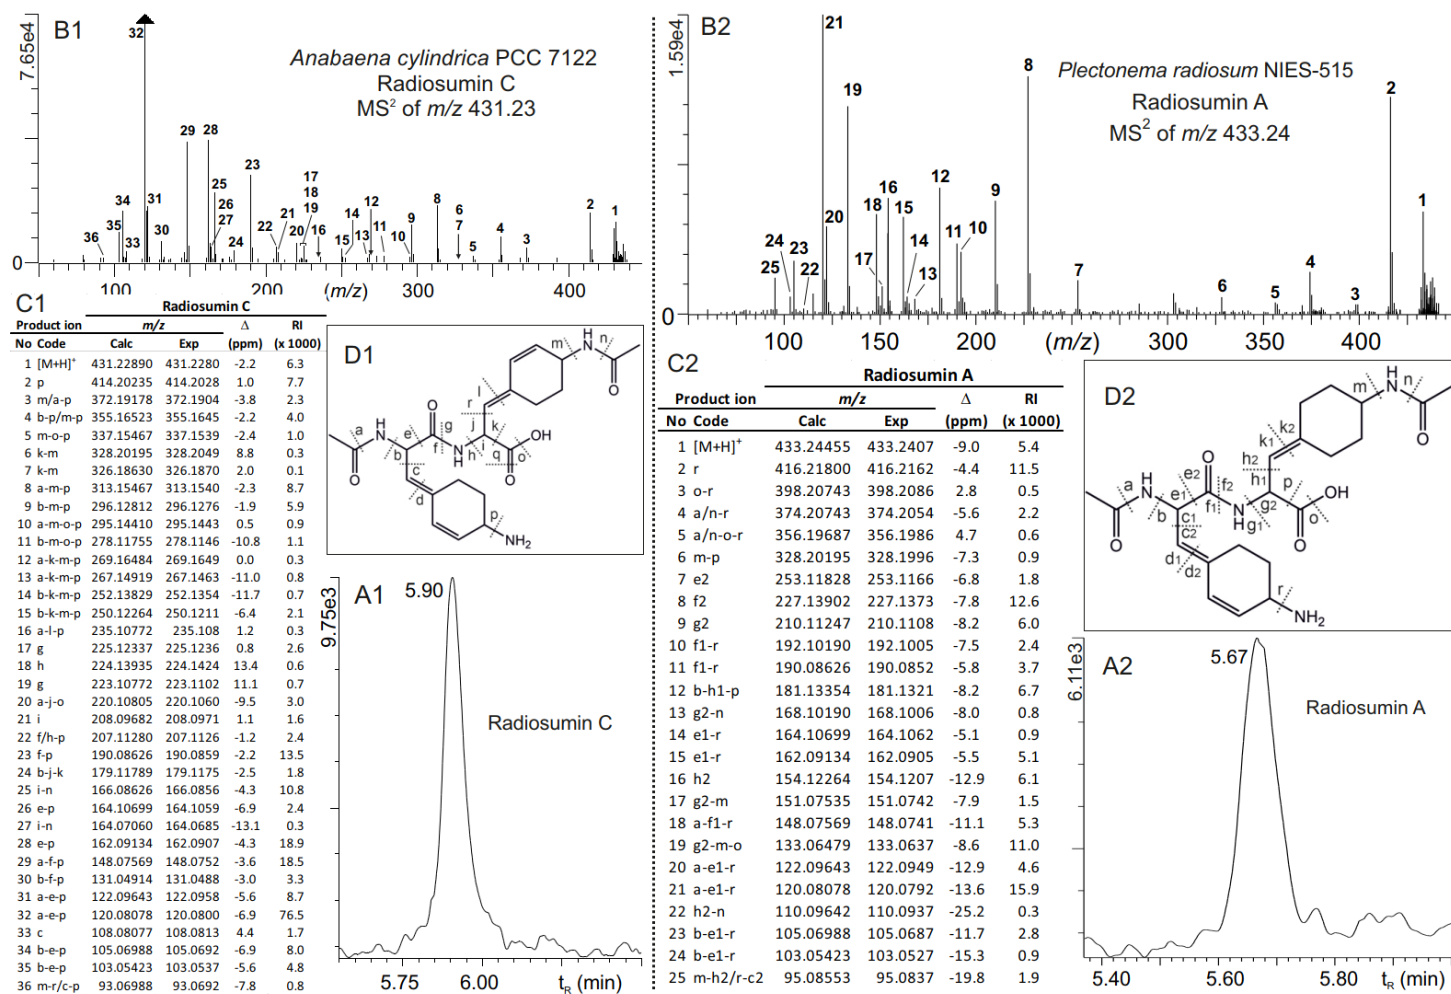

**Figure S1** Ultra-performance liquid chromatograph with quadrupole time-of-flight (UPLC-QTOF) spectrometry analysis of radiosumin C (**3**) from *Anabaena cylindrica* PCC 7122 and radiosumin A (**1**) from *Plectonema radiosum* NIES-515. (A) Extracted ion chromatogram (*m/z* 431.22 [M +H]<sup>+</sup>) or (*m/z* 433.24 [M +H]<sup>+</sup>). (B) Secondary mass (MS<sup>2</sup>) spectra (parent ion *m/z* 431.22 or *m/z* 433.24) of the 5.91 min or 5.67 min peak from *m/z* 50 to 450. (C) Table of annotated ions from MS<sup>2</sup> with the difference ( $\Delta$ ) of experimental (Exp) *m/z* value to calculated (Calc) *m/z* value and relative ion intensities (RI). (D) Structure of radiosumin C (**3**) or radiosumin A (**1**).

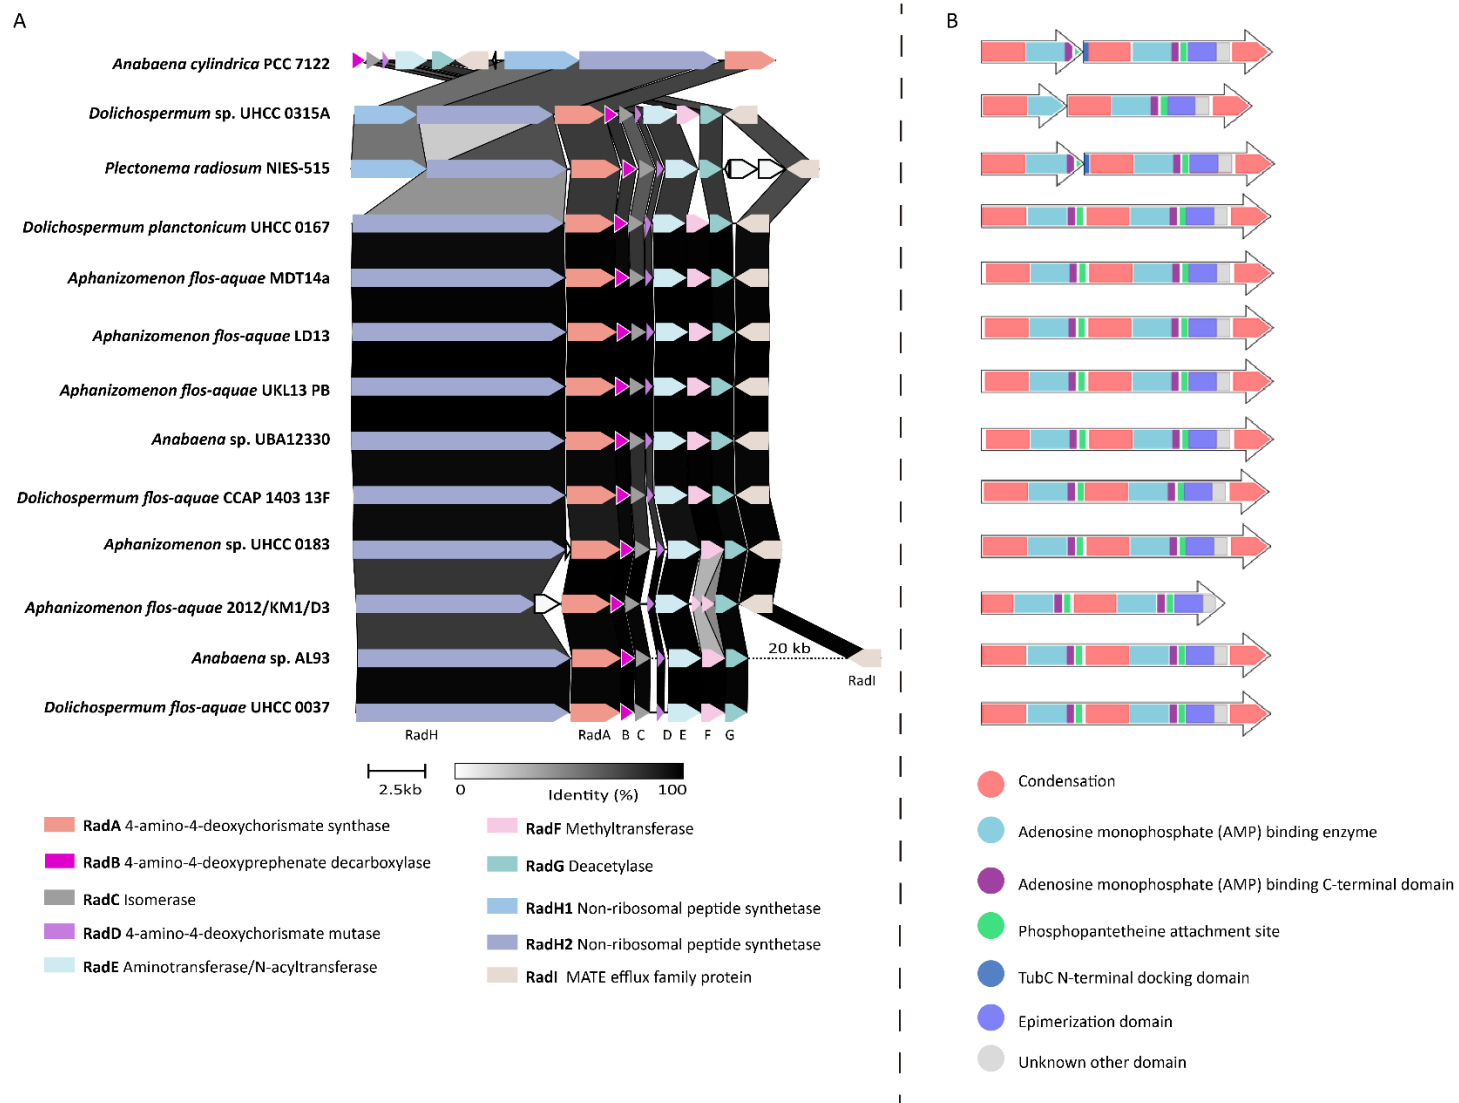

**Figure S2** Bioinformatic analysis of radiosumin biosynthetic pathways. (A) Identification and comparison of the radiosumin (*rad*) biosynthetic gene cluster from 13 strains of cyanobacteria. (B) Organization of catalytic domains in the RadH non-ribosomal peptide synthetase.

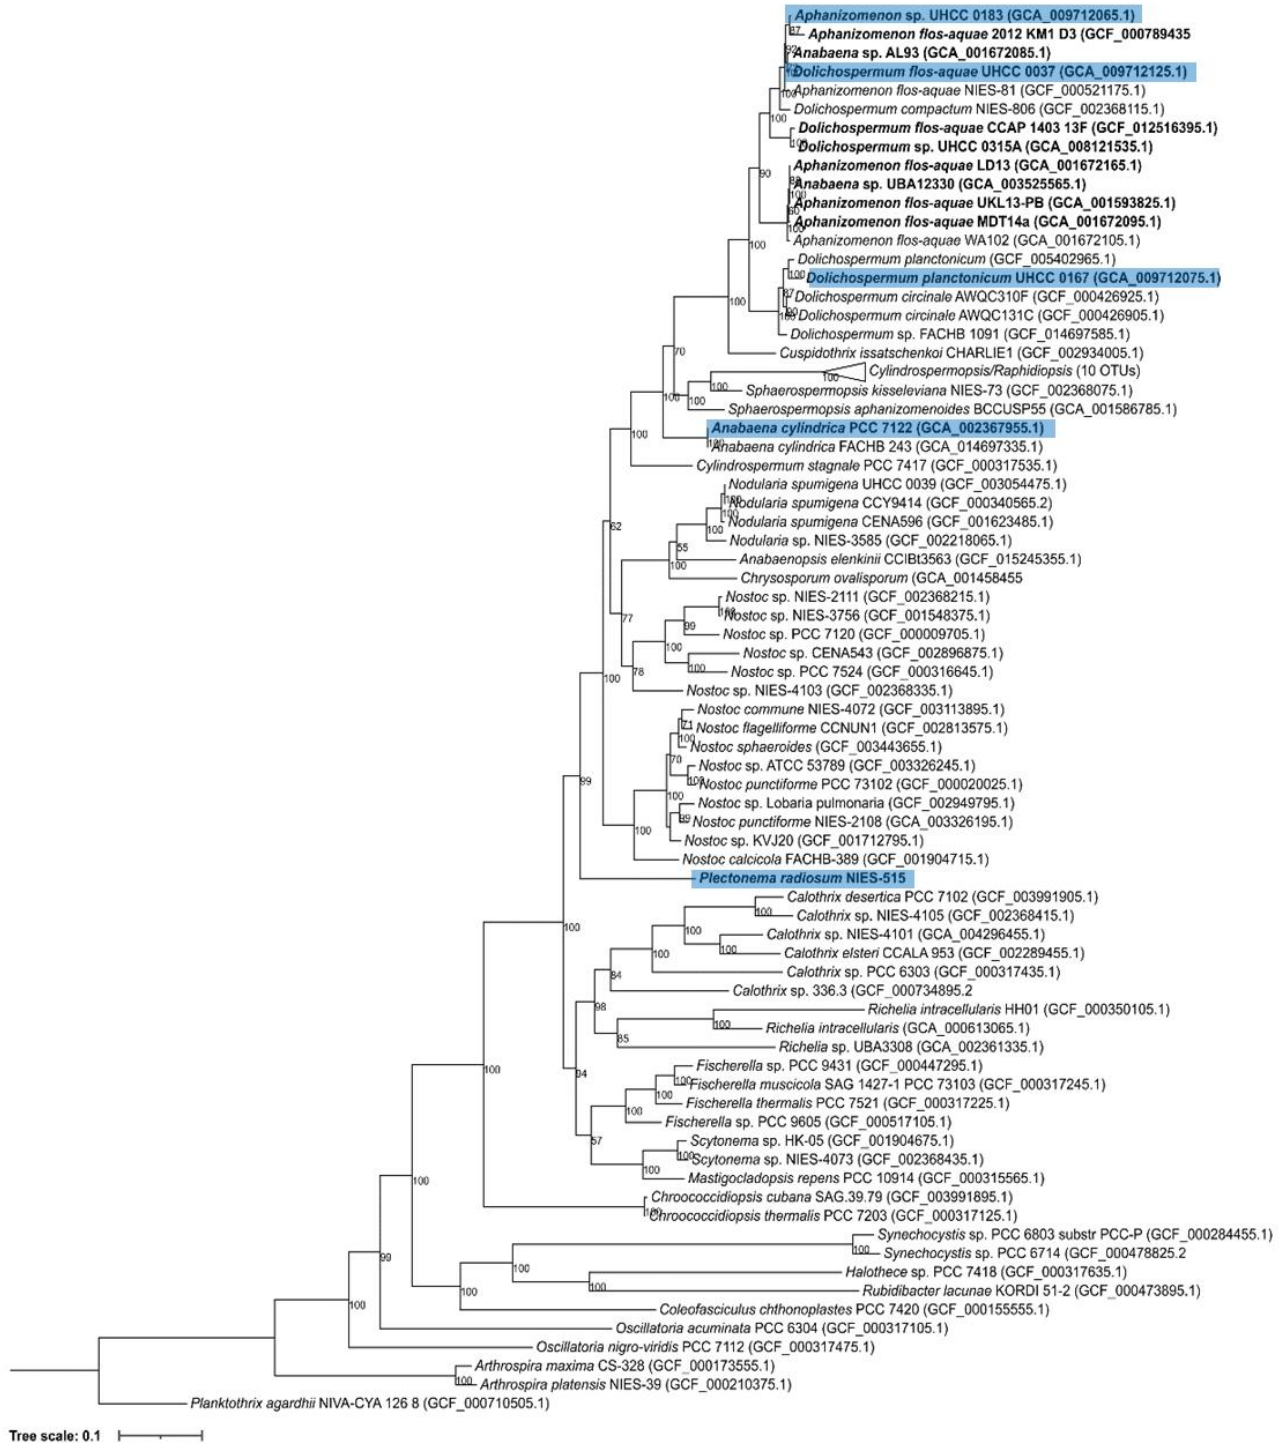

**Figure S3** Maximum likelihood phylogenomic tree based on concatenated alignment of 120 bacterial single-copy conserved marker genes from 75 cyanobacterial genomes. Cyanobacteria that encode a radiosumin biosynthetic gene cluster are marked in bold. Radiosumin producers are marked in bold and with a blue box.

A

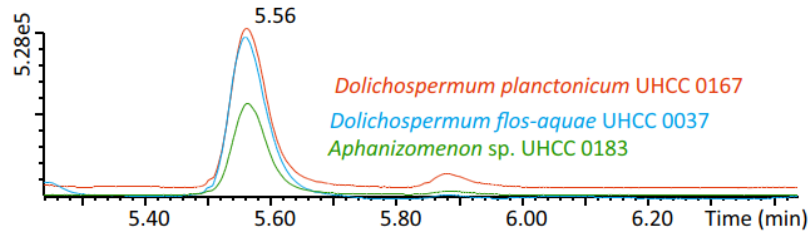

B

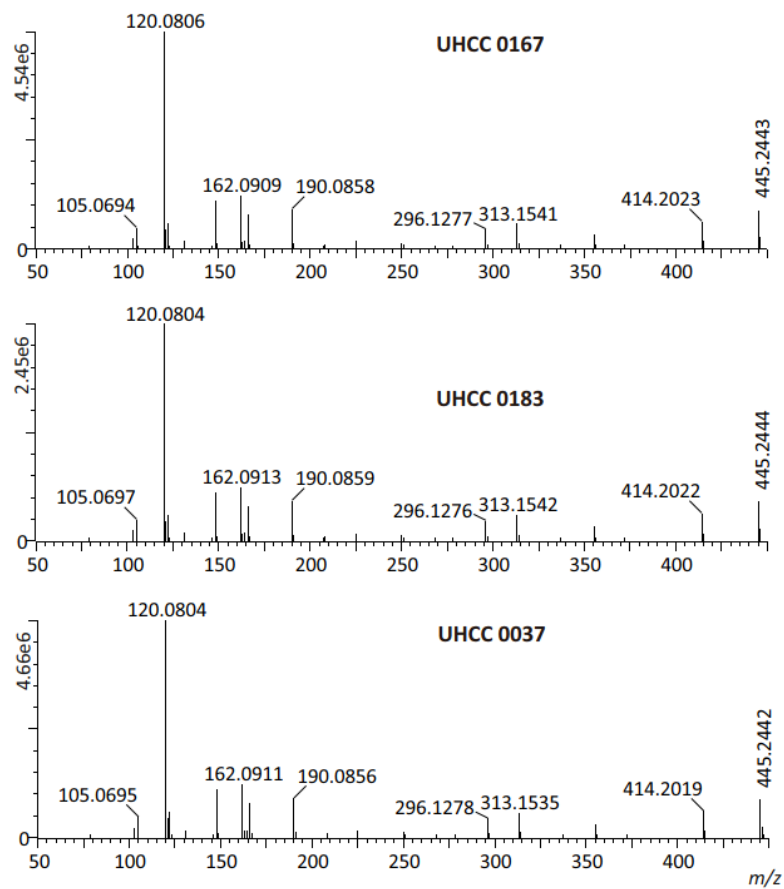

**Figure S4** UPLC-QTOF spectrometry analysis of molecule  $m/z$  445.24 from three strains. (A) MS<sup>2</sup> ( $m/z$  445.24) chromatograms of methanol extracts from *Dolichospermum planctonicum* UHCC 0167, *Dolichospermum flos-aquae* UHCC 0037, and *Aphanizomenon* sp. UHCC 0183. (C) MS<sup>2</sup> spectra of the 5.56 min peaks ( $m/z$  445.24) from 50 to 450 of extracts from *Dolichospermum planctonicum* UHCC 0167, *Dolichospermum flos-aquae* UHCC 0037 and *Aphanizomenon* sp. UHCC 0183.

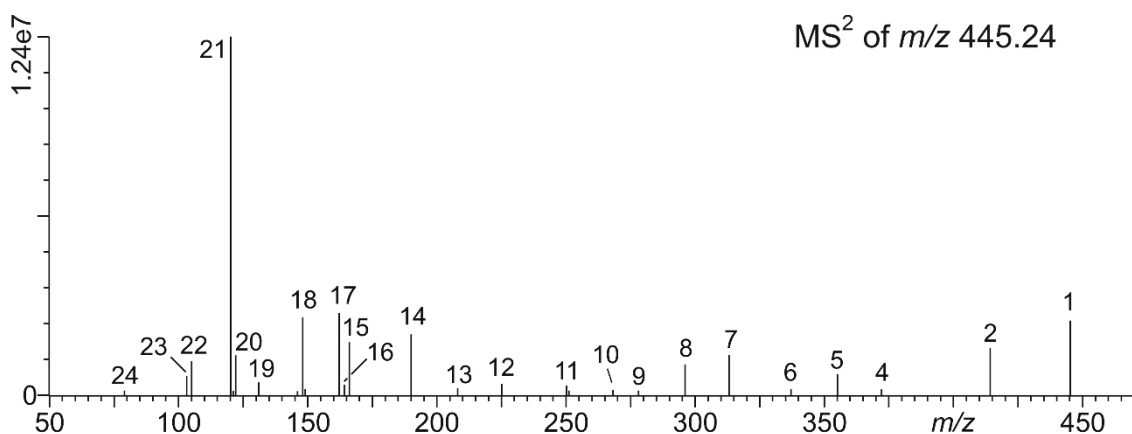

| molecule 445.24        |            |          |                   |
|------------------------|------------|----------|-------------------|
| Product ion<br>No Code | <i>m/z</i> |          | $\Delta$<br>(ppm) |
|                        | Calc       | Exp      |                   |
| 1 [M+H] <sup>+</sup>   | 445.24455  | 445.2440 | -1.3              |
| 2 p                    | 414.20235  | 414.2017 | -1.7              |
| 3 m                    | 386.20743  | 386.2061 | -3.6              |
| 4 a-p                  | 372.19178  | 372.1908 | -2.8              |
| 5 m-p                  | 355.16523  | 355.1645 | -2.2              |
| 6 m-o-p                | 337.15467  | 337.1541 | -1.8              |
| 7 a-m-p                | 313.15467  | 313.1539 | -2.6              |
| 8 b-m-p                | 296.12812  | 296.1278 | -1.2              |
| 9 b-m-o-p              | 278.11755  | 278.1167 | -3.2              |
| 10 a-k-m-p             | 267.14919  | 267.1487 | -2.0              |
| 11 b-k-m-p             | 250.12264  | 250.1221 | -2.4              |
| 12 g                   | 225.12337  | 225.1232 | -1.0              |
| 13 h                   | 208.09682  | 208.0969 | 0.1               |
| 14 f-p                 | 190.08626  | 190.0864 | 0.5               |
| 15 h-n                 | 166.08626  | 166.0867 | 2.3               |
| 16 e-p                 | 164.10699  | 164.1073 | 1.6               |
| 17 e-p                 | 162.09134  | 162.0916 | 1.3               |
| 18 a-t-p               | 148.07569  | 148.0764 | 4.5               |
| 19 b-t-p               | 131.04914  | 131.0494 | 1.6               |
| 20 a-e-p / c           | 122.09643  | 122.0966 | 1.0               |
| 21 a-e-p / c           | 120.08078  | 120.0813 | 3.9               |
| 22 b-e-p               | 105.06988  | 105.0702 | 2.6               |
| 23 b-e-p               | 103.05423  | 103.0544 | 1.2               |
| 24 d-p                 | 79.05423   | 79.0541  | -2.3              |

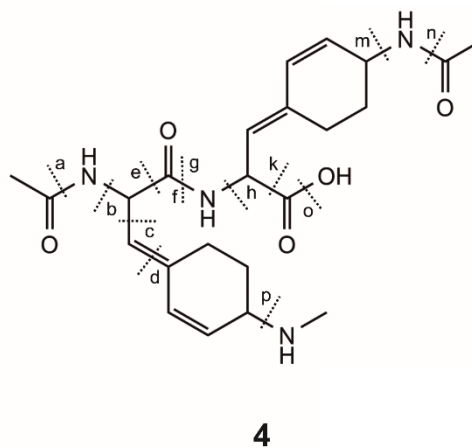

**Figure S5** MS<sup>2</sup> spectra of protonated molecules *m/z* 445.24 and table of annotated product ions with differences ( $\Delta$ ) of experimental (Exp) *m/z* values to calculated (Calc) *m/z* values).

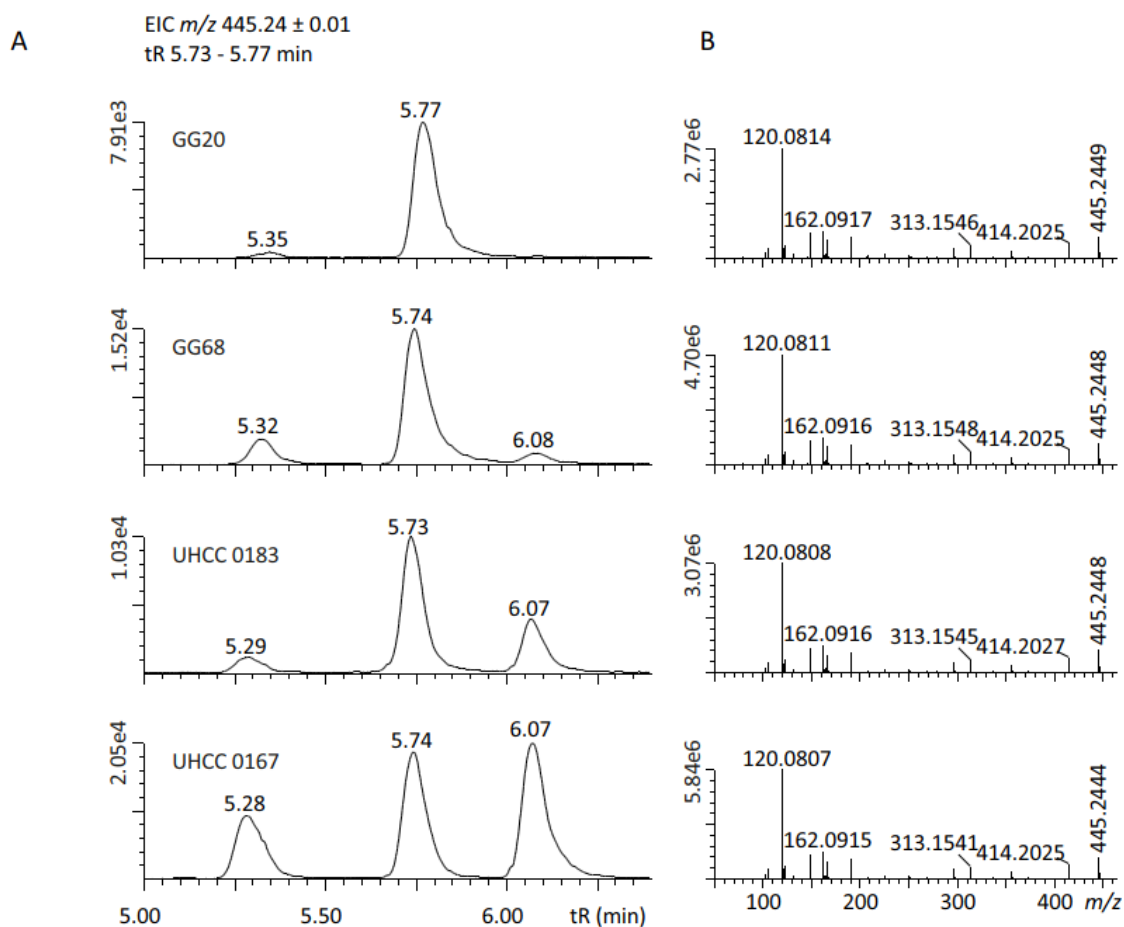

**Figure S6** UPLC-QTOF spectrometry analysis of compound **4** in methanol extracts from blooms GG20 and GG68, using *Aphanizomenon* sp. UHCC 0183 and *Dolichospermum planctonicum* UHCC 0167 as controls. (A) Extracted ion chromatograms of methanol extracts from blooms GG20, GG68 and *Aphanizomenon* sp. UHCC 0183 and *Dolichospermum planctonicum* UHCC 0167. (B) MS<sup>2</sup> spectra from  $m/z$  50 to 465 of peaks eluting from 5.77 min showed diagnostic product ions for **4** (Figure S5).

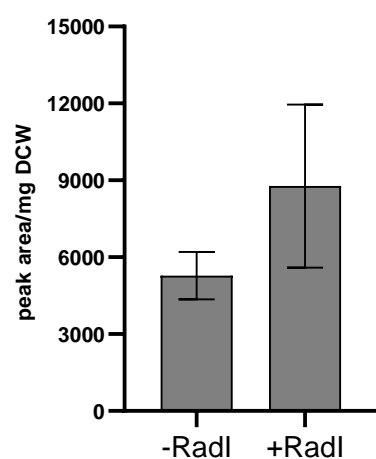

**Figure S7** Estimated production levels of compound **4** in *E. coli* BAP1 strains, harbouring pET28b-ptetO-*radHABCDEFGG-GFP* (-RadI) or pET28b-ptetO-*radHABCDEFGGI-GFP* (+RadI). Production levels were calculated by using peak area divided by dry cell weight. Data are representative of triplicate determinations. Error bars indicate standard deviations.



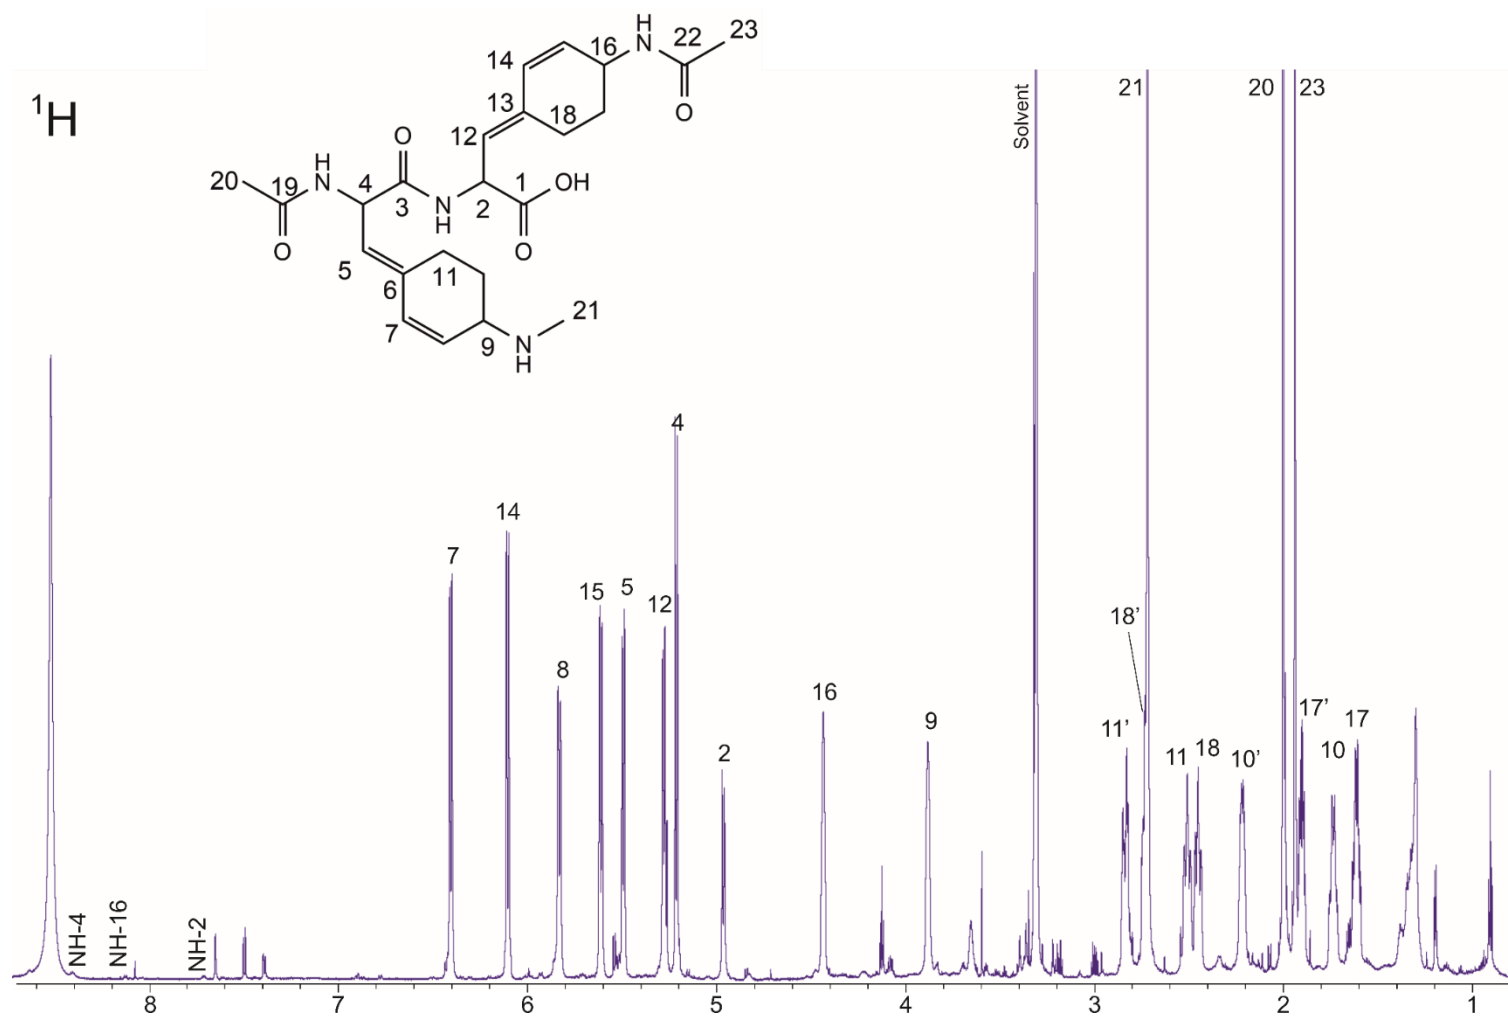

**Figure S8** Annotated proton spectrum of radiosumin D (**4**) in  $\text{CD}_3\text{OD}$ .

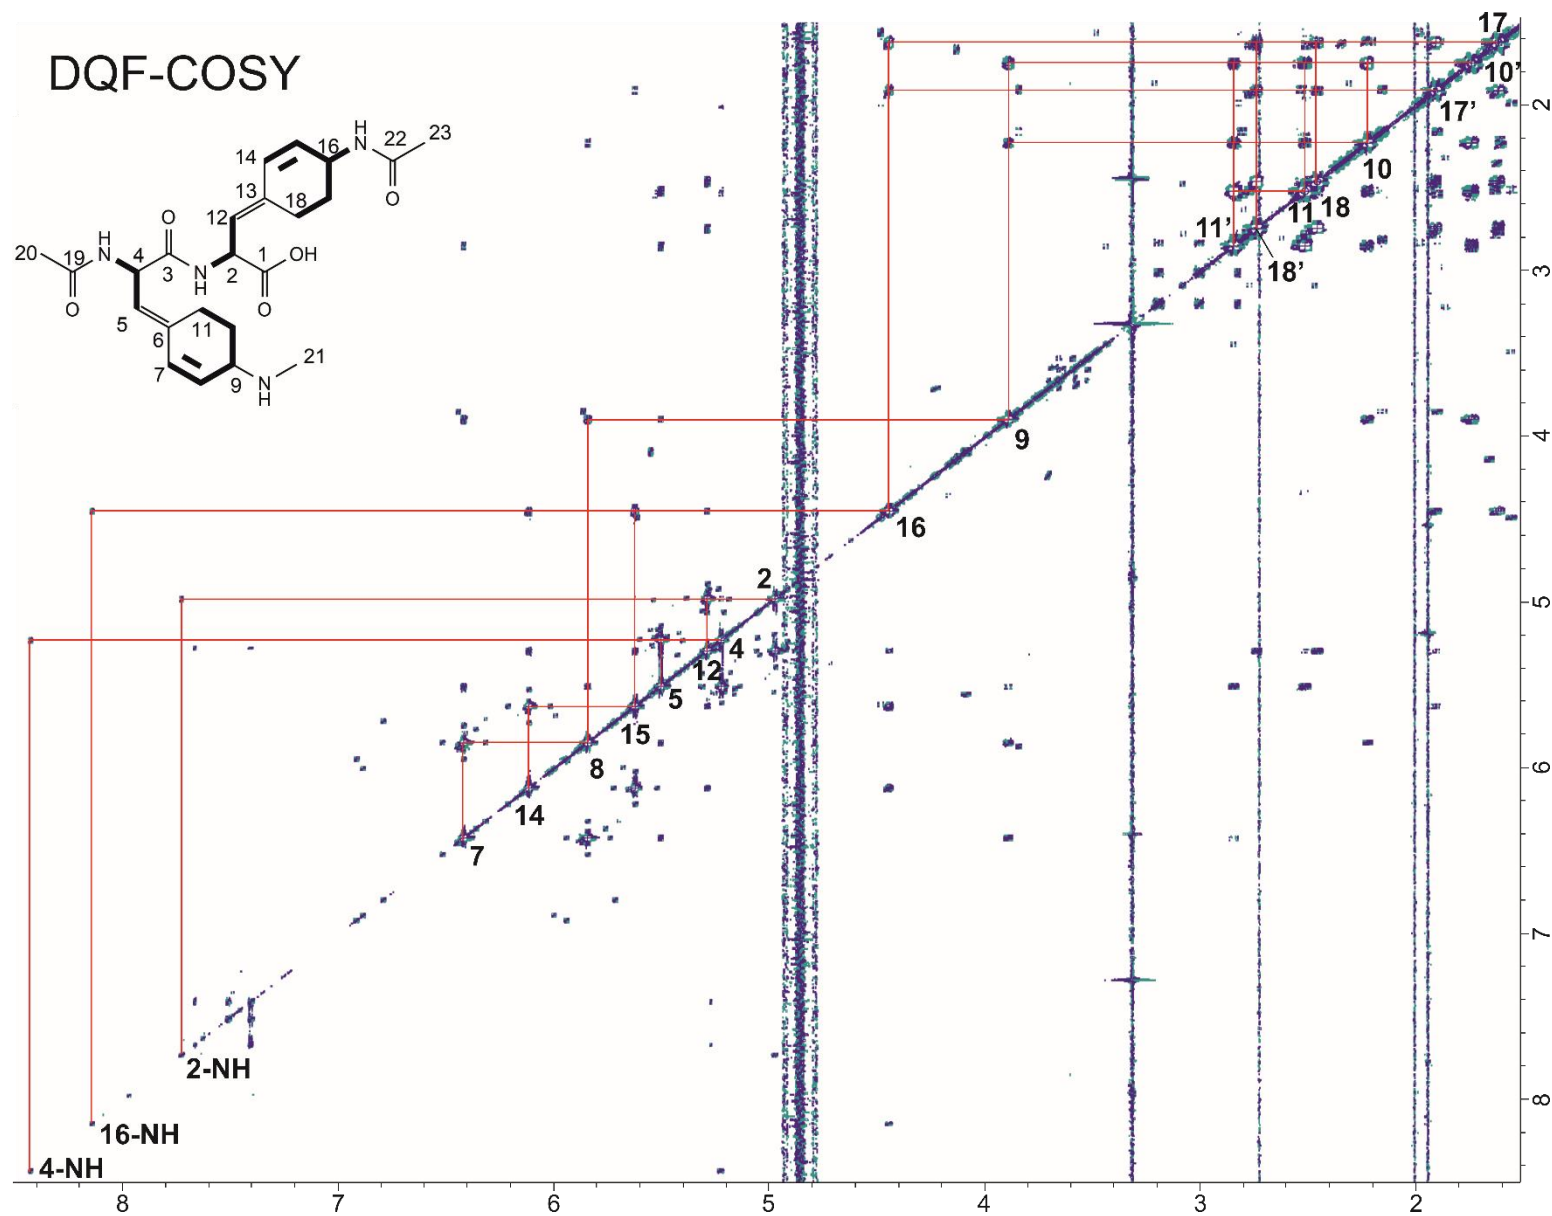

**Figure S9** DQF-COSY spectrum of radiosumin D (**4**) in CD<sub>3</sub>OD.

ROESY

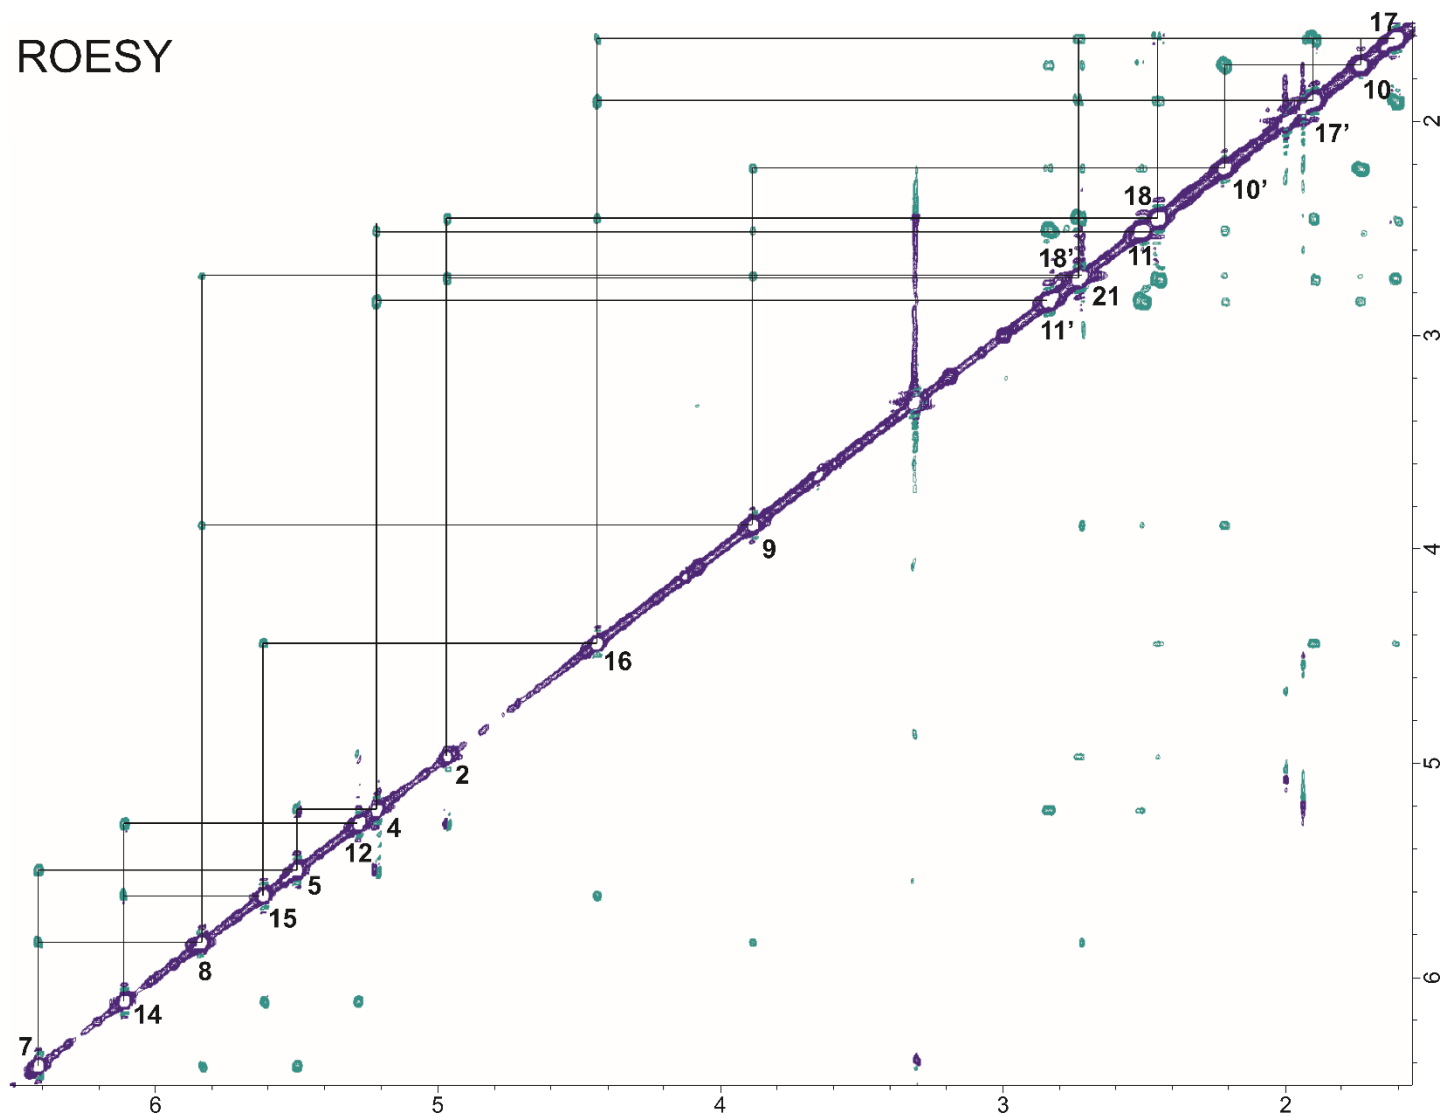

Figure S10 ROESY spectrum of radiosumin D (**4**) in CD<sub>3</sub>OD.

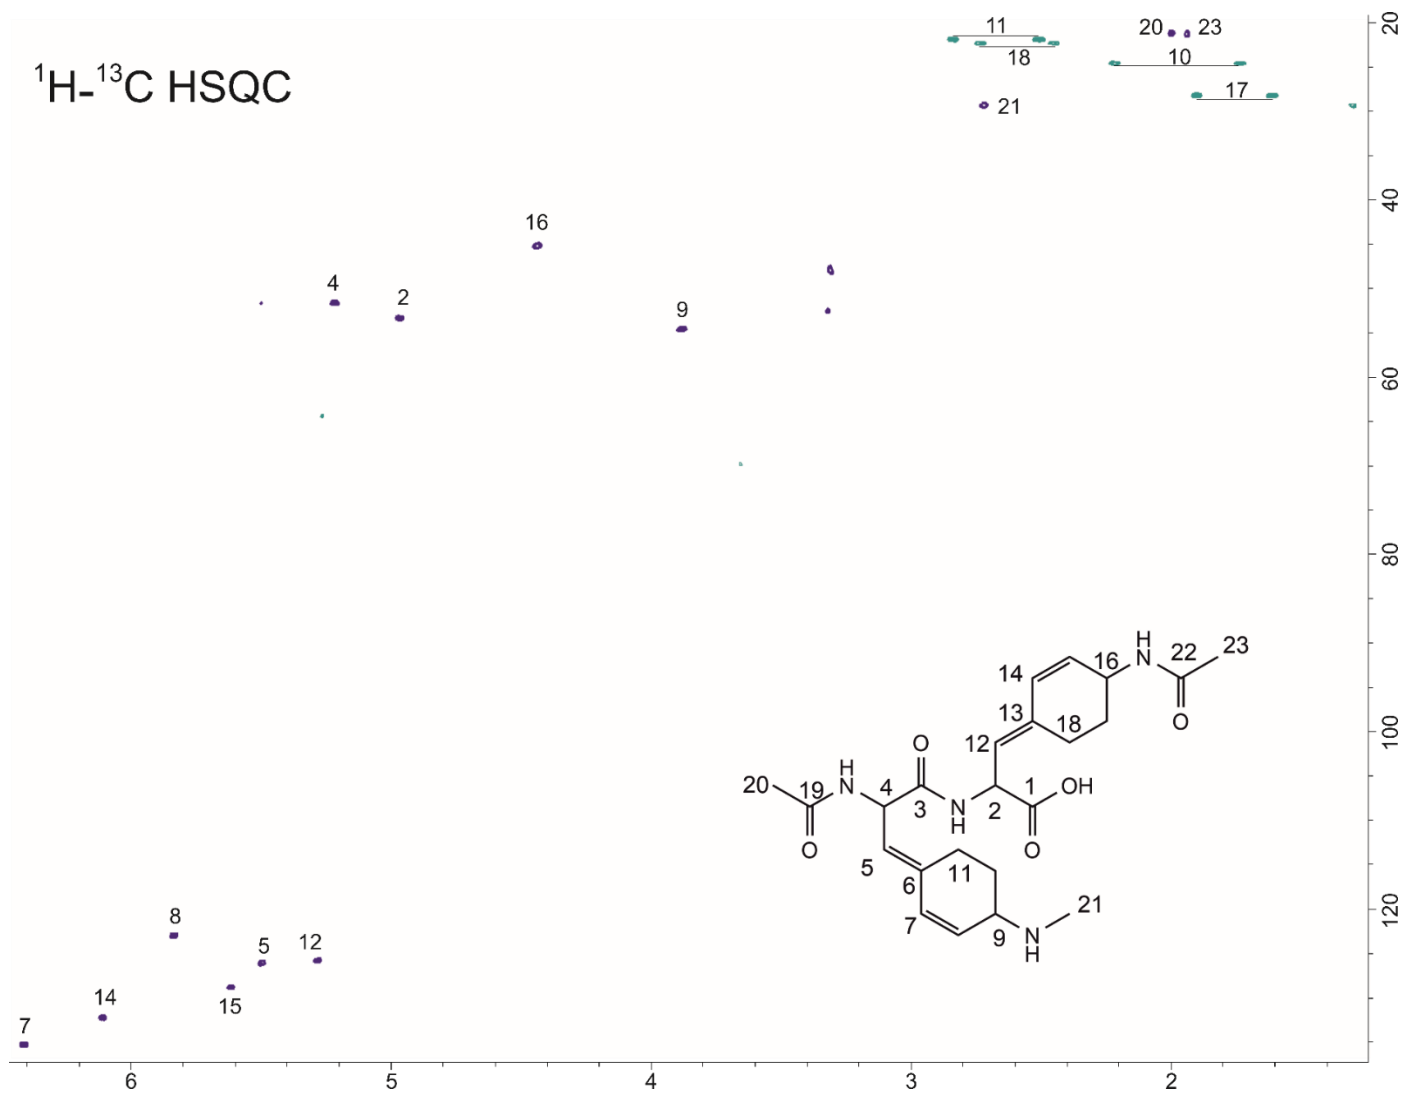

**Figure S11**  $^1\text{H}$ - $^{13}\text{C}$  HSQC spectrum of radiosumin D (**4**) in  $\text{CD}_3\text{OD}$ .

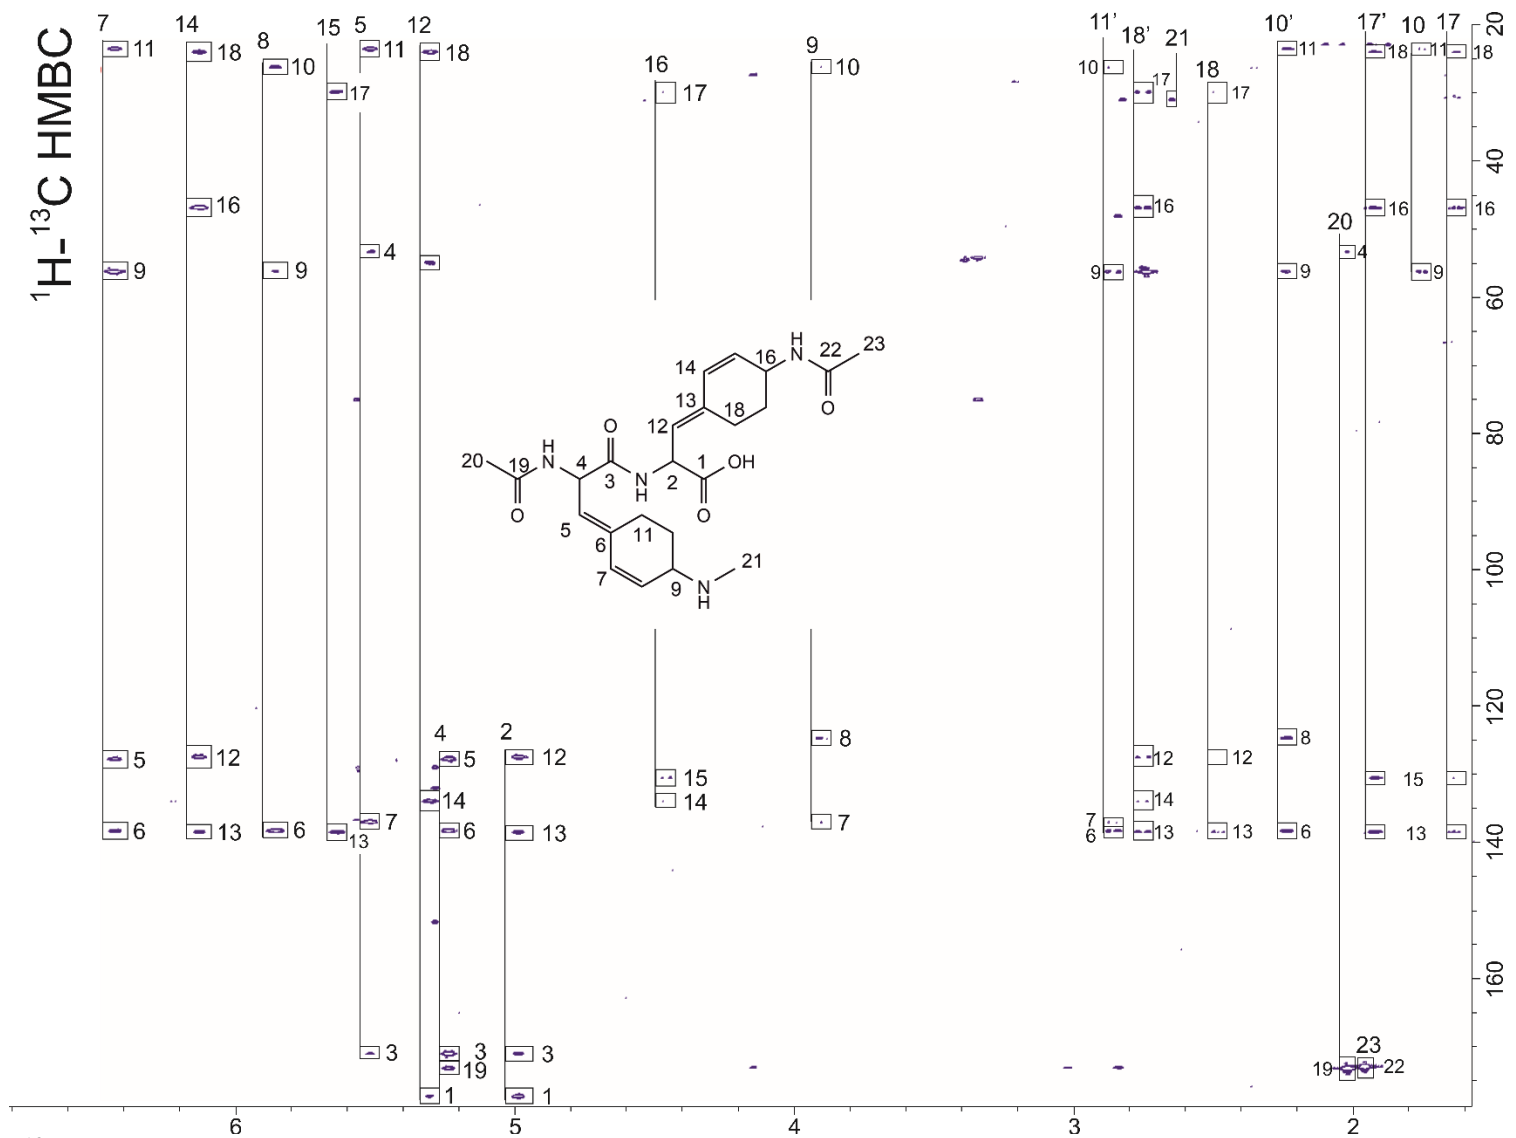

Figure S12  $^1\text{H}-^{13}\text{C}$  HMBC spectrum of radiosumin D (**4**) in  $\text{CD}_3\text{OD}$ .

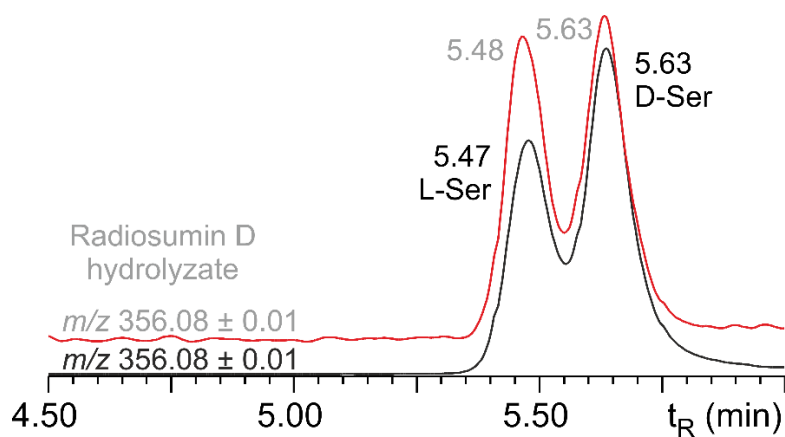

**Figure S13** Extracted negative ion ( $m/z 356.08$ ;  $[M-H]^-$ ) chromatograms of Marfey derivative (1-fluoro-2,4-dinitrophenyl-5-L-alanine) radiosumin D (**4**) hydrolysate and L- and D-Ser reference amino acid Marfey derivatives.

A

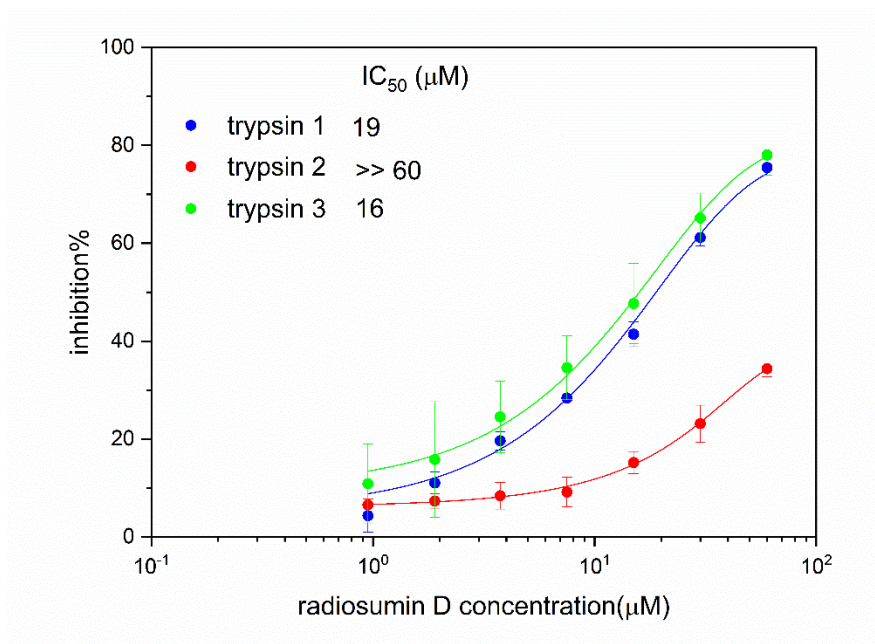

B

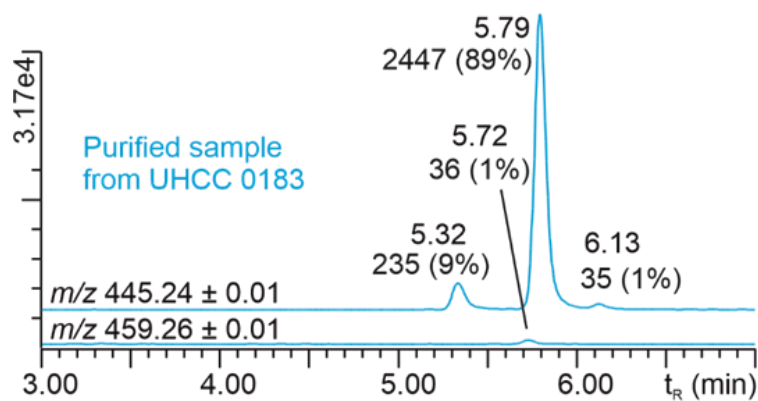

**Figure S14** (A) Inhibition of human trypsin-isoenzymes by purified radiosumin D (**4**) sample (B) UPLC-QTOF spectrometry analysis of purified sample from *Aphanizomenon* sp. UHCC 0183.

**Table S1.** Stachelhaus 10-residue specificity code for RadH adenylation domains predicted by NRPS predictor <sup>2</sup> as implemented in antiSMASH 6.0. <sup>1</sup>

| <b>Strains</b>                                 | <b>Accession number<br/>(genome)</b> | <b>Accession number<br/>(protein)</b> | <b>Module1</b> | <b>Module2</b> |
|------------------------------------------------|--------------------------------------|---------------------------------------|----------------|----------------|
| <i>Dolichospermum planctonicum</i> UHCC 0167   | VILE02                               | WP_265915766                          | DAEMAGGVLK     | DAETSGGVLK     |
| <i>Aphanizomenon</i> sp. UHCC 0183             | VILC01                               | WP_168465319                          | -----          | -----          |
| <i>Dolichospermum flos-aquae</i> UHCC 0037     | VILF01                               | WP_168636709                          | -----          | -----          |
| <i>Aphanizomenon flos-aquae</i> MDT14a         | LJOX01                               | OBQ31167                              | -----          | -----          |
| <i>Aphanizomenon flos-aquae</i> 2012 KM1 D3    | JSDP01                               | QSV71108                              | -----          | -----          |
| <i>Anabaena</i> sp. AL93                       | LJOU01                               | OBQ20459                              | -----          | ----M-----     |
| <i>Aphanizomenon flos-aquae</i> LD13           | LJOY01                               | OBQ27227                              | -----          | ----M-----     |
| <i>Aphanizomenon flos-aquae</i> UKL13 PB       | LTEC02                               | MBO1043034                            | -----          | ----M-----     |
| <i>Anabaena</i> sp. UBA12330                   | DQEB01                               | HCQ23020                              | -----          | ----M-----     |
| <i>Dolichospermum</i> sp. UHCC 0315A           | CP043056                             | WP_246863057<br>WP_148760648          | -----          | ----M-----     |
| <i>Dolichospermum flos-aquae</i> CCAP 1403 13F | CP051206                             | WP_168696234                          | -----          | ----M-----     |
| <i>Anabaena cylindrica</i> PCC 7122            | CP003659                             | WP_015215721<br>WP_015215720          | -----S-----    | ----M-----     |
| <i>Plectonema radiosum</i> NIES-515            | JAOWRF01                             | WP_263746364<br>WP_263746366          | -----S-----    | --S--IA-----   |



**Table S2.** Strains and plasmids used in this study.

| Strains                                    | Description                                                                                                                                      | Reference or source |
|--------------------------------------------|--------------------------------------------------------------------------------------------------------------------------------------------------|---------------------|
| <i>E. coli</i> BAP1                        | Host strain for expression<br>BL21(DE3)<br>$\Delta prpRBCD :: T7prom-sfp, T7prom-prpE$                                                           | 3                   |
| Plasmids                                   | Description                                                                                                                                      |                     |
| pET28b-ptetO- <i>GFPv2</i>                 | Tetracycline inducible expression plasmid, ColE1, Kan <sup>R</sup> , addition of <i>GFP</i>                                                      | 4                   |
| pET28b-ptetO- <i>radH-GFP</i>              | Tetracycline inducible expression plasmid, ColE1, Kan <sup>R</sup> , addition of <i>GFP</i> , harbouring bimodular NRPS protein gene <i>radH</i> | This study          |
| pET28b-ptetO- <i>radH-radABCDEFGF-GFP</i>  | Built using pET28b-ptetO- <i>radH-GFP</i> as the vector and <i>radABCDEFGF</i> single piece nucleotide insert.                                   | This study          |
| pET28b-ptetO- <i>radH-radABCDEFGFI-GFP</i> | <i>radI</i> inserted into the pET28b-ptetO- <i>radH-radABCDEFGF-GFP</i> vector                                                                   | This study          |

**Table S3.** List of oligonucleotide primers used for cloning and screening procedures.

| <b>Name</b>        | <b>Sequence (5'-3')</b>                                  | <b>Description</b>                                                                               |
|--------------------|----------------------------------------------------------|--------------------------------------------------------------------------------------------------|
| gib_ptetO_radH1_F  | TCAGTGATAGAGAAGAGGATCGACCATGCAGGGCAATTCTTCTTTG           | Amplification of <i>radH</i> with 25 bp homology sequence                                        |
| gib_ptetO_radH2_R  | CAGTTCTTCACCTTTGCTAACCATGCACGTGTTATCCATAAACTCTATCTTTTAAG | Amplification of <i>radH</i> with 25 bp homology sequence                                        |
| C-GFP_for_1        | CATGGTTAGCAAAGGTGA                                       | Amplification of pET-28b-ptetO backbone for subsequent cloning of <i>radH</i>                    |
| spec-ptet-R        | GGTCGATCCTCTTCTCTATC                                     | Amplification of pET-28b-ptetO backbone for subsequent cloning of <i>radH</i>                    |
| screen_0167radH2_F | TCAGGTTTCTGTAGGAGTTATTTTC                                | Colony screening and sequencing primer                                                           |
| screen_GFP_R       | TTACCGTTGGTCGCATCACC                                     | Colony screening and sequencing primer                                                           |
| C-GFP_for_2        | CATGGTTAGCAAAGGTGAAGAAGTGT                               | Amplification of pET-28b-ptetO- <i>radH</i> backbone for subsequent cloning of <i>radABCDEFG</i> |
| spec_radH2-R       | GTGTTATCCATAAACTCTATCTTTTAAGATTTCAACAT                   | Amplification of pET-28b-ptetO- <i>radH</i> backbone for subsequent cloning of <i>radABCDEFG</i> |
| gib_radH2_radA-F   | AAAAGATAGAGTTTATGGATAACACATGAAAACCCTGATTATTGACAAC        | Amplification of <i>radABCDEFG</i> with 22 bp homology sequence                                  |
| gib_GFP_radG-R     | CAGTTCTTCACCTTTGCTAACCATGCACGTGTCAATGCCTGCCCAATAATC      | Amplification of <i>radABCDEFG</i> with 25 bp homology sequence                                  |

---

|          |                                                        |                                                              |
|----------|--------------------------------------------------------|--------------------------------------------------------------|
| radI-fwd | <b>AGGATTATGGCAGGCATTGACACATGAACCCAACACTCACAAATAAG</b> | Amplification of <i>radI</i> with 25 bp<br>homology sequence |
| radI-rev | <b>TTCTTCACCTTTGCTAACCATGCACGTGCTATATGCGCCTGTTTTTC</b> | Amplification of <i>radI</i> with 25 bp<br>homology sequence |

---

Homology arms are marked in bold

**Table S4.** Root-mean-square deviation (RMSD) values of the ligand (red) and the protein  $\text{C}\alpha$  atoms (blue) for each trypsin-ligand pair.

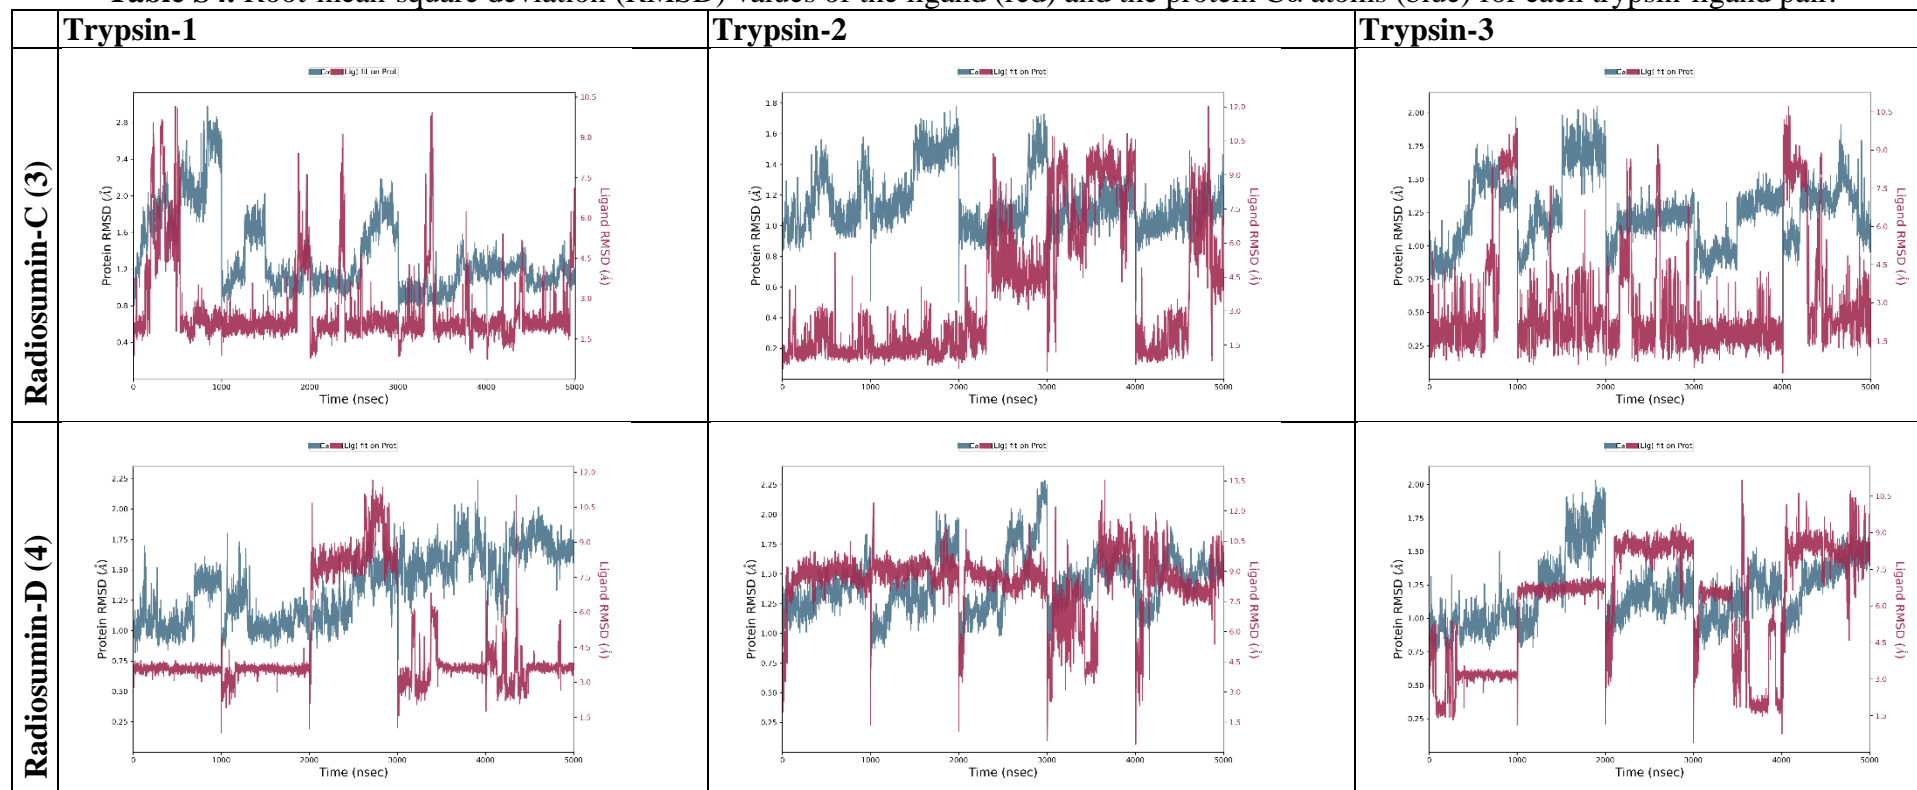

**Table S5.** Ligand contact histograms of amino acids of trypsin-1, trypsin-2 and trypsin-3 that are in contact with radiosumin C (3) and radiosumin D (4) in MD simulation. Red = ionic interaction, green = H bond interaction, blue = water bridge interaction, purple = hydrophobic interaction.

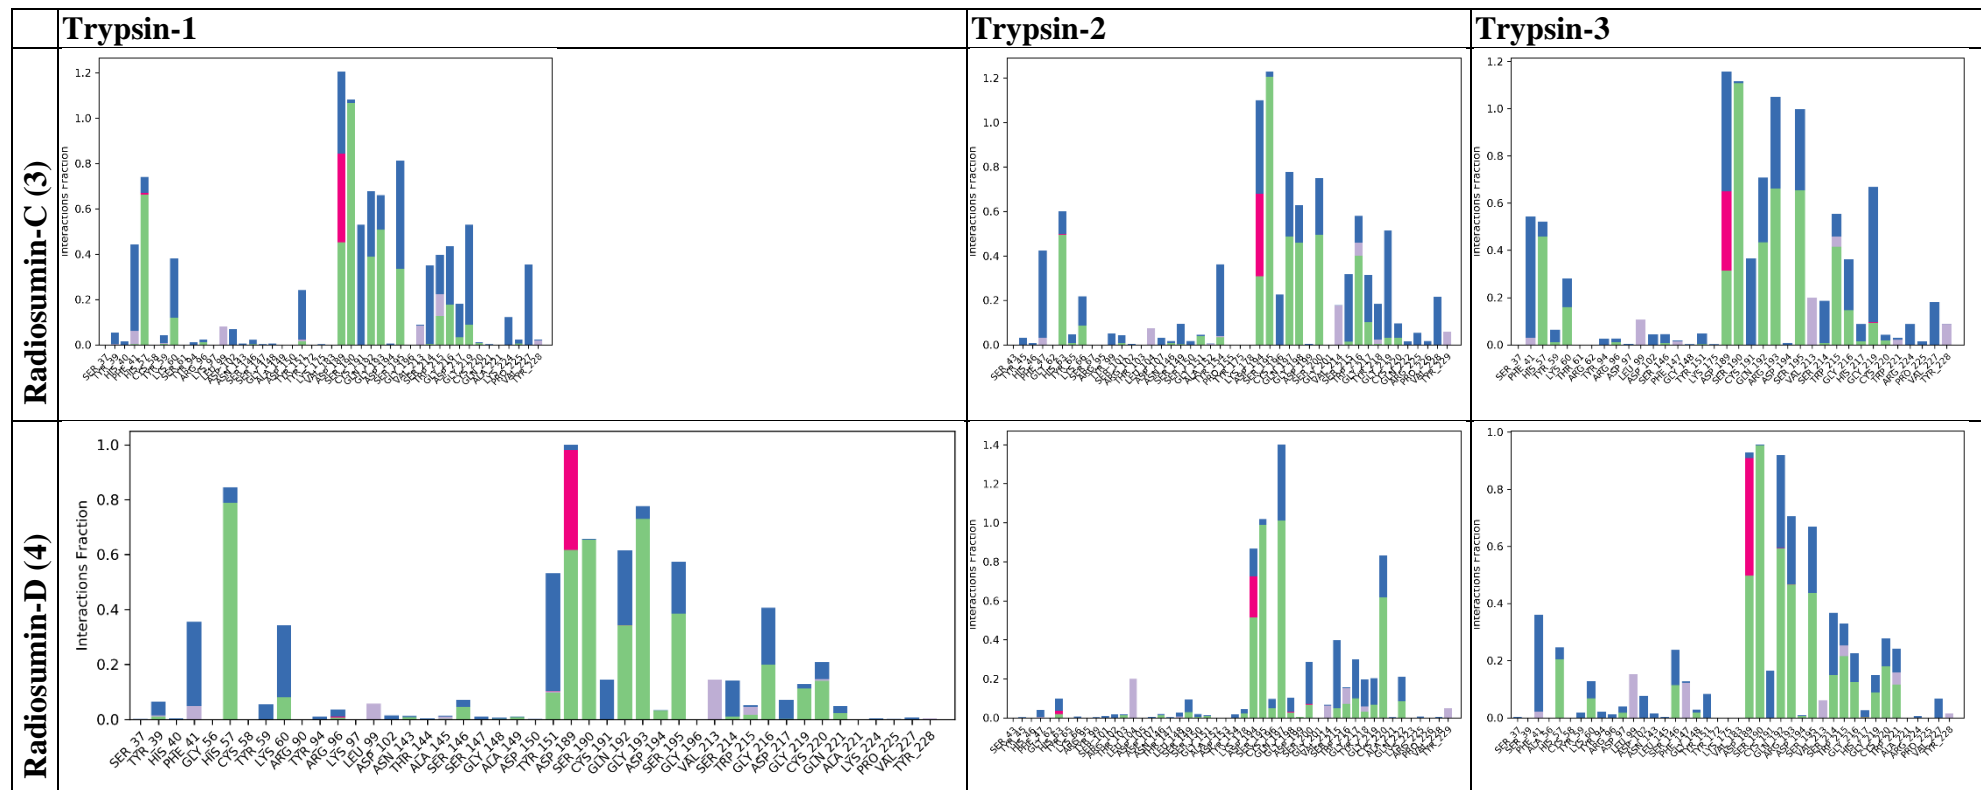

**Table S6.** Experimental parameters used in NMR experiments

| Experiment                         | SW F <sub>1</sub> [Hz] | SW F <sub>2</sub> [Hz] | t <sub>1,max</sub> [ms] | t <sub>2</sub> [ms] | τ <sub>m</sub> [ms] | NS |
|------------------------------------|------------------------|------------------------|-------------------------|---------------------|---------------------|----|
| <sup>1</sup> H with pre-saturation | -                      | 12820                  | -                       | 51280               | -                   | 16 |
| TOCSY                              | 8002                   | 8012                   | 256                     | 2048                | 90                  | 8  |
| DQF-COSY                           | 8800                   | 8800                   | 1024                    | 4096                | -                   | 8  |
| ROESY                              | 8800                   | 8800                   | 200                     | 1024                | 200                 | 8  |
| <sup>13</sup> C HSQC               | 36226                  | 8012                   | 256                     | 1024                | -                   | 8  |
| <sup>13</sup> C HSQC-TOCSY         | 36226                  | 8012                   | 256                     | 900                 | 90                  | 24 |
| <sup>13</sup> C HMBC               | 40256                  | 8012                   | 512                     | 900                 | -                   | 64 |
| <sup>15</sup> N HMBC               | 8112                   | 8012                   | 128                     | 900                 | -                   | 24 |

1. K. Blin, S. Shaw, A. M. Kloosterman, Z. Charlop-Powers, G. P. van Wezel, M. H. Medema and T. Weber, *Nucleic Acids Res.*, 2021, **49**, W29-W35.
2. M. Rottig, M. H. Medema, K. Blin, T. Weber, C. Rausch and O. Kohlbacher, *Nucleic Acids Res.* 2011, **39**, W362-367.
3. B. A. Pfeifer, S. J. Admiraal, H. Gramajo, D. E. Cane and C. Khosla, *Sci.*, 2001, **291**, 1790-1792.
4. E. R. Duell, P. M. D'Agostino, N. Shapiro, T. Woyke, T. M. Fuchs and T. A. M. Gulder, *Microb Cell Fact.*, 2019, **18**, 1-11.
